# Supplementary material for: Calcium Binding Protein S100A16 Expedites Proliferation, Invasion and EMT Process in Gastric Cancer
Source: Research Square preprint supplement (doi:10.21203/rs.3.rs-674611/v1), 2021-07-09
Supplement: Supplementary file 1 [file b0bc6f38e2682740395c185d.docx]

**SUPPLEMENTARY MATERIALS**

**Supplementary figures:**


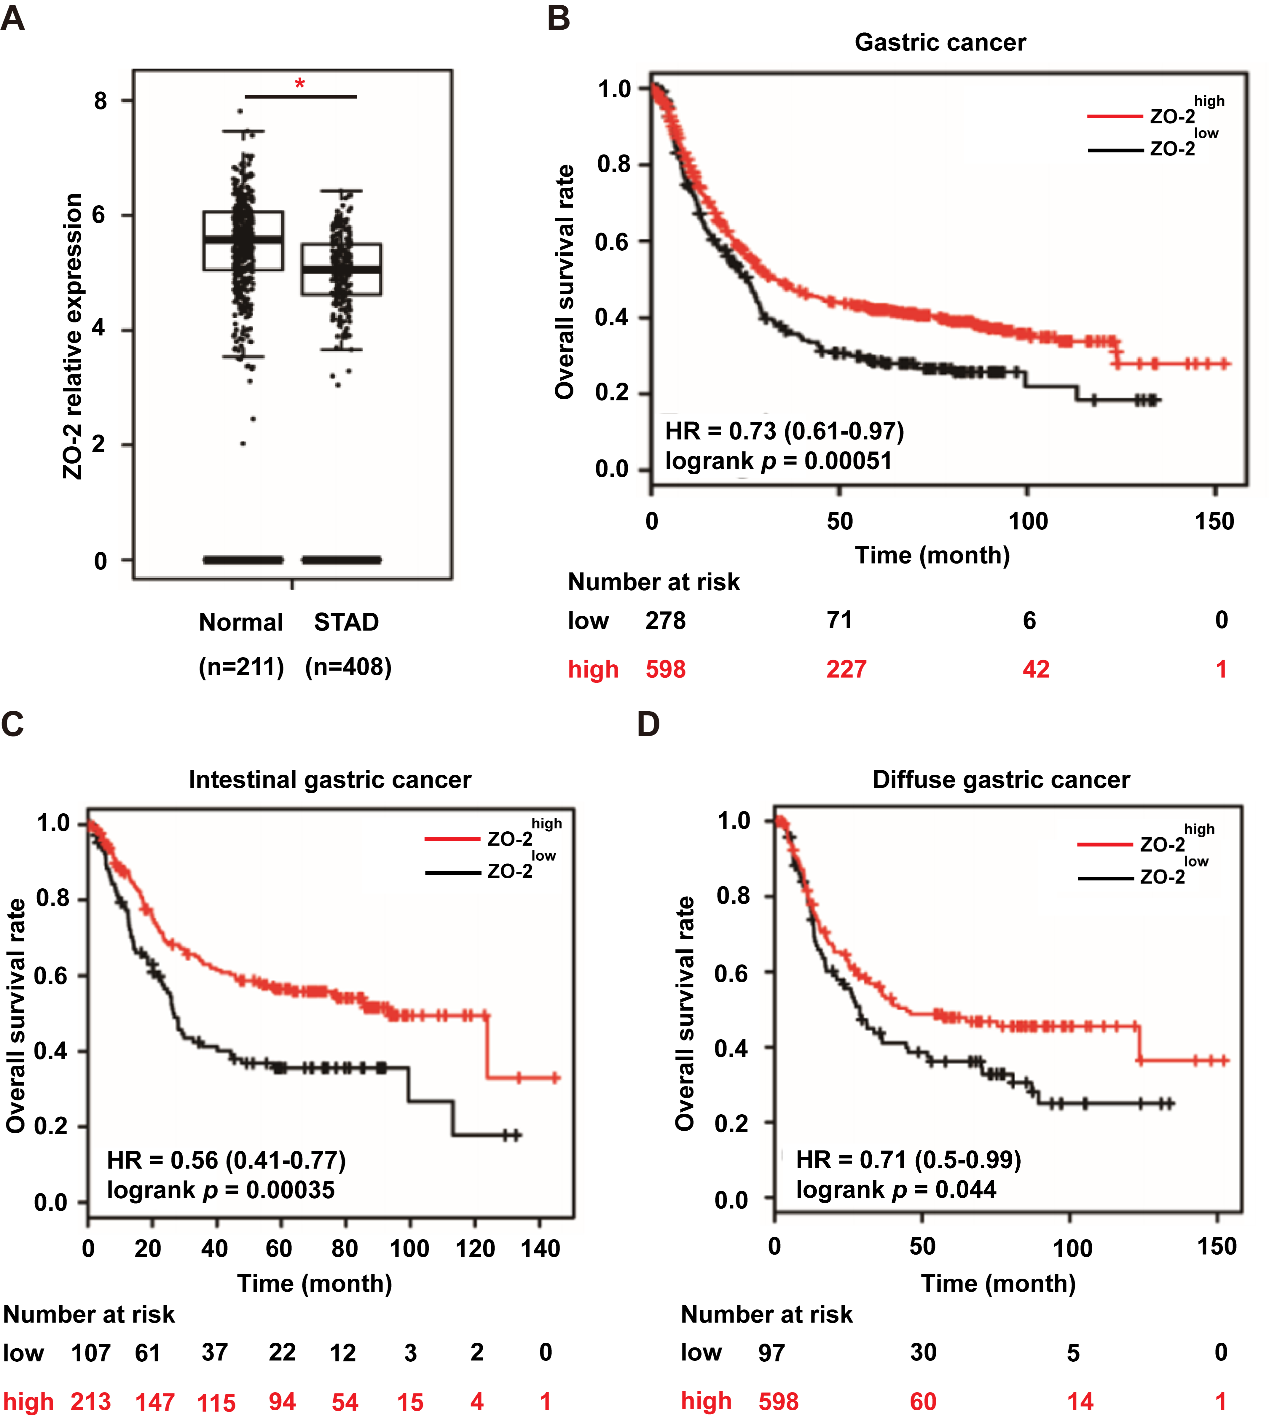


**Figure S1.** (**A**)ZO-2 expression in human gastric cancer tissues according to GEPIA database. **(B-D)** Kaplan–Meier survival analysis of ZO-2high and ZO-2low gastric cancer patients.
